# Supplementary material for: Effect of Glycolipids Application Combined with Nitrogen Fertilizer Reduction on Maize Nitrogen Use Efficiency and Yield
Source: MDPI journal article supplement (doi:10.3390/plants13091222), 2024-04-28
Supplement: s1 [file s1]

**Table S1** The initial and treated basic soil chemical properties under different fertilization treatments during experiment periods

| Time        | Treatments          | pH        | Soil organic matter (g kg <sup>-1</sup> ) | Soil total nitrogen (g kg <sup>-1</sup> ) | Soil total phosphorus (g kg <sup>-1</sup> ) | Soil total potassium (g kg <sup>-1</sup> ) | Soil available phosphorus (mg kg <sup>-1</sup> ) | Soil available potassium (mg kg <sup>-1</sup> ) |
|-------------|---------------------|-----------|-------------------------------------------|-------------------------------------------|---------------------------------------------|--------------------------------------------|--------------------------------------------------|-------------------------------------------------|
| <b>2020</b> | <b>Initial soil</b> | 7.90±0.31 | 22.14±3.70                                | 1.18±0.29                                 | 0.71±0.10                                   | 22.53±5.57                                 | 51.52±7.02                                       | 179.18±30.41                                    |
|             | <b>CK</b>           | 7.88±0.44 | 20.48±2.97                                | 1.10±0.31                                 | /                                           | /                                          | 48.77±11.52                                      | 184.04±25.47                                    |
|             | <b>NPK</b>          | 7.48±0.61 | 23.41±2.96                                | 1.21±0.24                                 | /                                           | /                                          | 53.87±6.27                                       | 171.84±40.26                                    |
|             | <b>N+PKT</b>        | 7.51±0.34 | 22.48±4.10                                | 1.23±0.18                                 | /                                           | /                                          | 52.77±5.79                                       | 188.84±26.64                                    |
| <b>2021</b> | <b>0.9N+PKT</b>     | 7.52±0.87 | 22.17±0.94                                | 1.19±0.21                                 | /                                           | /                                          | 59.18±10.69                                      | 179.29±30.58                                    |
|             | <b>0.8N+PKT</b>     | 7.69±0.48 | 22.27±2.87                                | 1.20±0.22                                 | /                                           | /                                          | 58.48±9.57                                       | 169.94±29.37                                    |
|             | <b>0.7N+PKT</b>     | 7.76±0.41 | 21.09±3.97                                | 1.14±0.36                                 | /                                           | /                                          | 54.57±8.47                                       | 173.29±32.71                                    |
|             | <b>PKT</b>          | 7.71±0.51 | 21.67±3.88                                | 1.08±0.46                                 | /                                           | /                                          | 50.66±14.98                                      | 161.08±17.65                                    |
|             | <b>CK</b>           | 7.79±0.70 | 19.01±5.47                                | 1.12±0.24                                 | /                                           | /                                          | 48.91±6.78                                       | 163.81±18.95                                    |
|             | <b>NPK</b>          | 7.53±0.15 | 23.88±2.17                                | 1.22±0.15                                 | /                                           | /                                          | 56.87±7.69                                       | 182.51±40.20                                    |
|             | <b>N+PKT</b>        | 7.57±0.42 | 23.08±3.14                                | 1.21±0.24                                 | /                                           | /                                          | 55.57±10.28                                      | 179.26±30.48                                    |
|             | <b>0.9N+PKT</b>     | 7.56±0.26 | 23.91±1.69                                | 1.23±0.24                                 | /                                           | /                                          | 57.33±4.90                                       | 173.26±16.54                                    |
| <b>2022</b> | <b>0.8N+PKT</b>     | 7.66±0.18 | 23.42±2.75                                | 1.14±0.11                                 | /                                           | /                                          | 57.61±10.22                                      | 177.40±19.64                                    |
|             | <b>0.7N+PKT</b>     | 7.66±0.20 | 21.68±2.00                                | 1.09±0.21                                 | /                                           | /                                          | 53.21±1.97                                       | 170.25±8.23                                     |
|             | <b>PKT</b>          | 7.71±0.26 | 21.00±3.41                                | 1.09±0.34                                 | /                                           | /                                          | 55.58±8.21                                       | 155.48±17.09                                    |

The results show means  $\pm$  standard deviations (n = 3).

**Table S2** Soil basic properties after 3-year different fertilization

| <b>Treatment</b> | <b>pH</b>    | <b>Soil C:N ratio</b> | <b>Soil available<br/>phosphorus (mg<br/>kg<sup>-1</sup>)</b> | <b>Soil available<br/>potassium (mg<br/>kg<sup>-1</sup>)</b> |
|------------------|--------------|-----------------------|---------------------------------------------------------------|--------------------------------------------------------------|
| <b>CK</b>        | 7.72±0.069 a | 9.01±0.46 b           | 46.74±1.23 b                                                  | 155.49±9.53 a                                                |
| <b>NPK</b>       | 7.54±0.087 a | 11.29±0.051 a         | 57.92±5.19 ab                                                 | 178.00±32.97 a                                               |
| <b>N+PKT</b>     | 7.59±0.026 a | 10.80±0.21 a          | 58.83±10.03 ab                                                | 172.49±5.77 a                                                |
| <b>0.9N+PKT</b>  | 7.5±0.050 a  | 10.87±0.28 a          | 61.12±13.92 a                                                 | 177.34±27.91 a                                               |
| <b>0.8N+PKT</b>  | 7.49±0.036 a | 11.10±0.24 a          | 58.62±6.70 ab                                                 | 172.56±12.53 a                                               |
| <b>0.7N+PKT</b>  | 7.58±0.020 a | 10.97±0.25 a          | 59.94±1.47 ab                                                 | 165.46±9.05 a                                                |
| <b>PKT</b>       | 7.51±0.026 a | 11.86±0.58 a          | 46.82±1.26 b                                                  | 145.30±3.59 a                                                |

The results show means  $\pm$  standard deviations (n = 3). Different lowercase letters after values indicate a significant difference under different treatments,  $P < 0.05$ .

**Table S3** Maize physiological traits after 3-year different fertilization

| Treatment       | Ear rows number | Kernel number | Ear length (cm) | Spike-stalk width (cm) | Thousand kernel weight (g) |
|-----------------|-----------------|---------------|-----------------|------------------------|----------------------------|
| <b>CK</b>       | 14.67±0.58 bc   | 38.33±0.58 d  | 19.35±0.87 c    | 46.17±0.04 e           | 269.08±3.35 e              |
| <b>NPK</b>      | 15.67±0.58 ab   | 42.33±0.58 ab | 21.32±0.75 ab   | 50.48±0.06 ab          | 344.87±10.66 b             |
| <b>N+PKT</b>    | 16.33±0.58 a    | 42.00±1.00 ab | 21.10±1.25 ab   | 49.54±0.07 c           | 355.00±0.09 a              |
| <b>0.9N+PKT</b> | 16.33±0.58 a    | 41.33±0.58 bc | 20.79±0.37 abc  | 50.79±0.10 a           | 337.82±4.02 bc             |
| <b>0.8N+PKT</b> | 15.33±0.58 abc  | 40.67±0.58 c  | 20.49±0.04 bc   | 49.95±0.08 bc          | 338.25±2.67 bc             |
| <b>0.7N+PKT</b> | 15.33±0.58 abc  | 42.67±0.58 a  | 22.11±0.12 a    | 48.67±0.85 d           | 330.83±2.67 c              |
| <b>PKT</b>      | 14.33±0.58 c    | 38.33±0.58 d  | 20.11±1.25 bc   | 48.56±0.60 d           | 285.41±5.61 d              |

The results show means  $\pm$  standard deviations (n = 3). Different lowercase letters after values indicate a significant difference under different treatments,  $P < 0.05$ .
